# Supplementary material for: Assembly of [CunIn]-based coordination polymers from cracking the 3D framework of bulk CuI via flexible N-heterocyclic ligands
Source: Royal Society of Chemistry journal article supplement (doi:10.1039/b908697h), 2009-01-01
Supplement: b908697h.pdf [file b908697h.pdf]

## Supporting Information

# Assembly of $[\text{Cu}_n\text{I}_n]$ -based Coordination Polymers from Cracking the 3D Framework of Bulk CuI via Flexible N-Heterocyclic Ligands†

Ling-Ling Li,<sup>a</sup> Hong-Xi Li,<sup>a</sup> Zhi-Gang Ren,<sup>a</sup> Dong Liu,<sup>a</sup> Yang Chen,<sup>a</sup> Yong Zhang,<sup>a</sup>

Jian-Ping Lang,<sup>\*a,b</sup>

<sup>a</sup> College of Chemistry, Chemical Engineering and Materials Science, Suzhou University, Suzhou 215123, P. R. China. Fax: 86-512-65880089; E-mail: [jplang@suda.edu.cn](mailto:jplang@suda.edu.cn)

<sup>b</sup> State Key Laboratory of Organometallic Chemistry, Shanghai Institute of Organic Chemistry, Chinese Academy of Sciences, Shanghai 200032, P. R. China

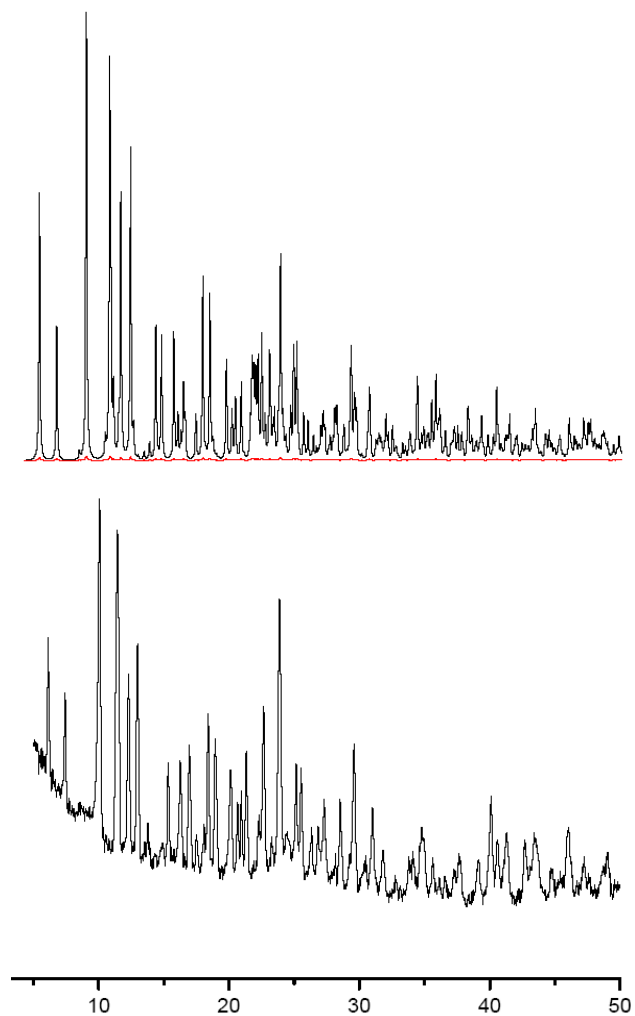

**Figure S1. Experimental (down) and simulated (up) PXRD patterns for 1.**

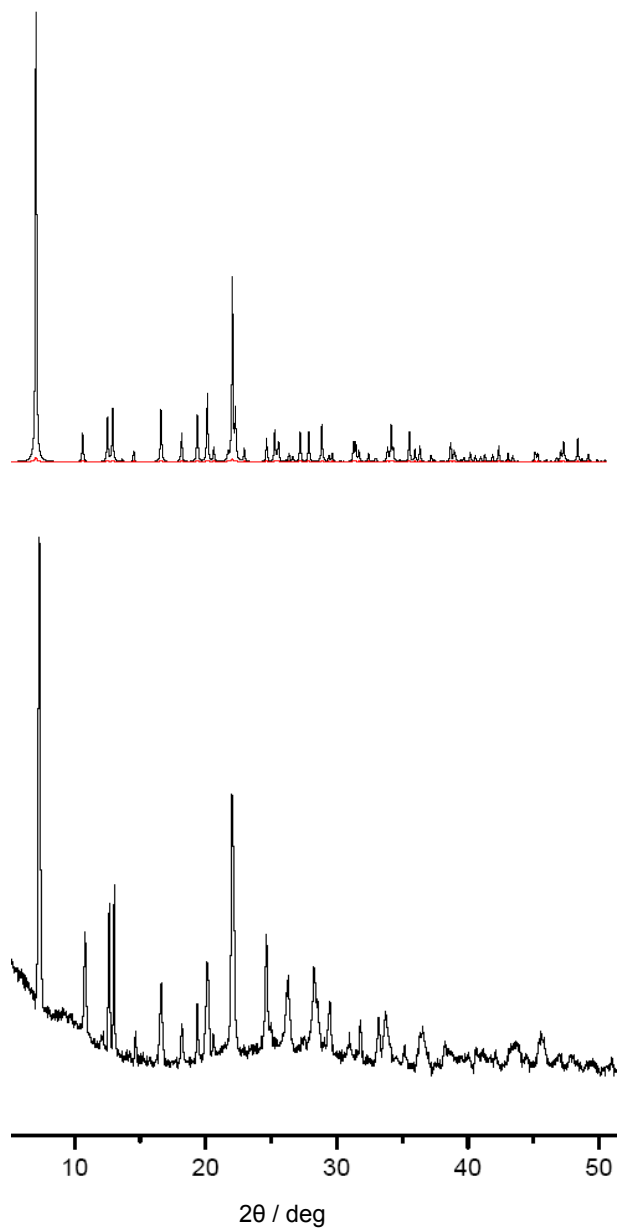

**Figure S2. Experimental (down) and simulated (up) PXRD patterns for 2.**

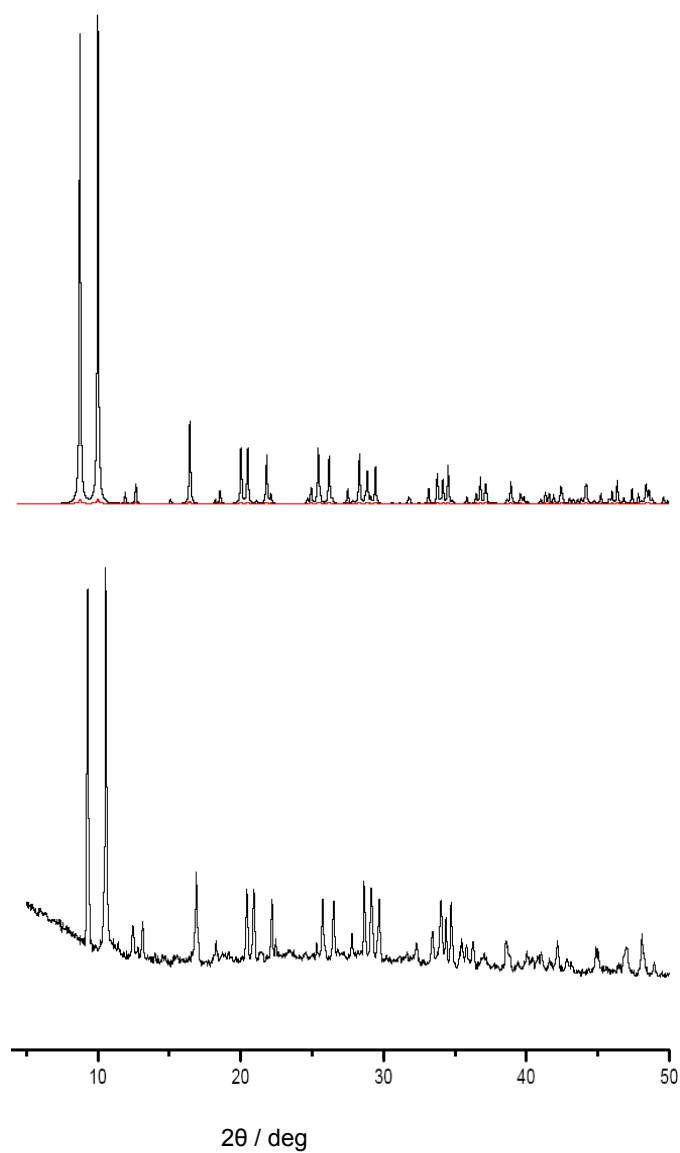

**Figure S3. Experimental (down) and simulated (up) PXRD patterns for 3.**

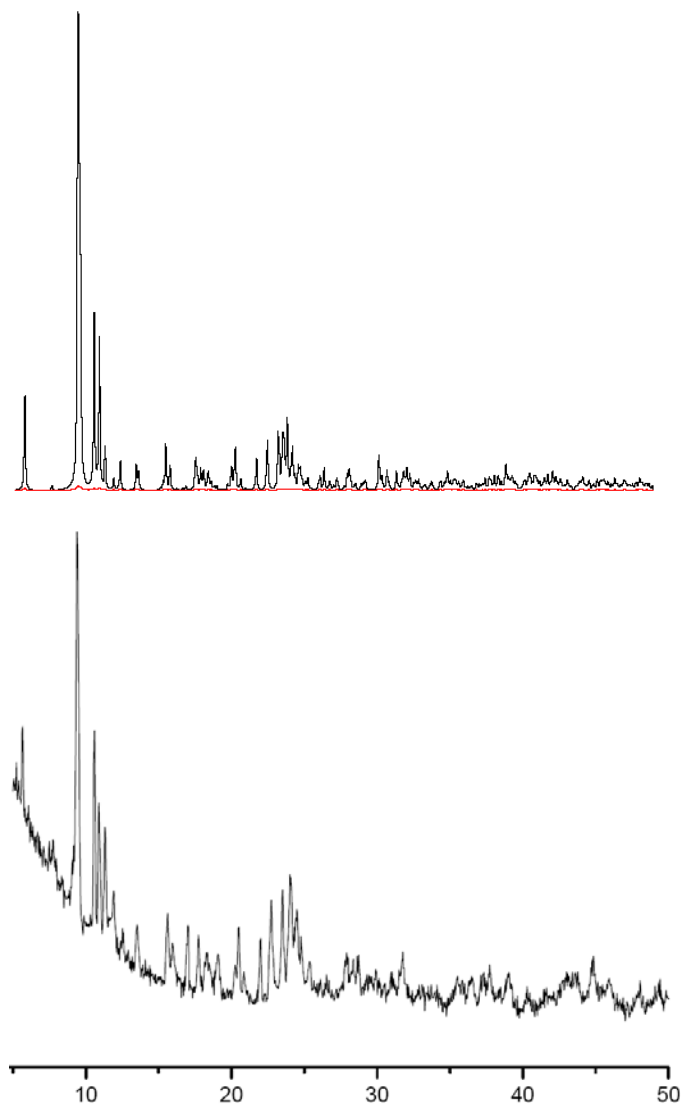

**Figure S4. Experimental (down) and simulated (up) PXRD patterns for 4.**

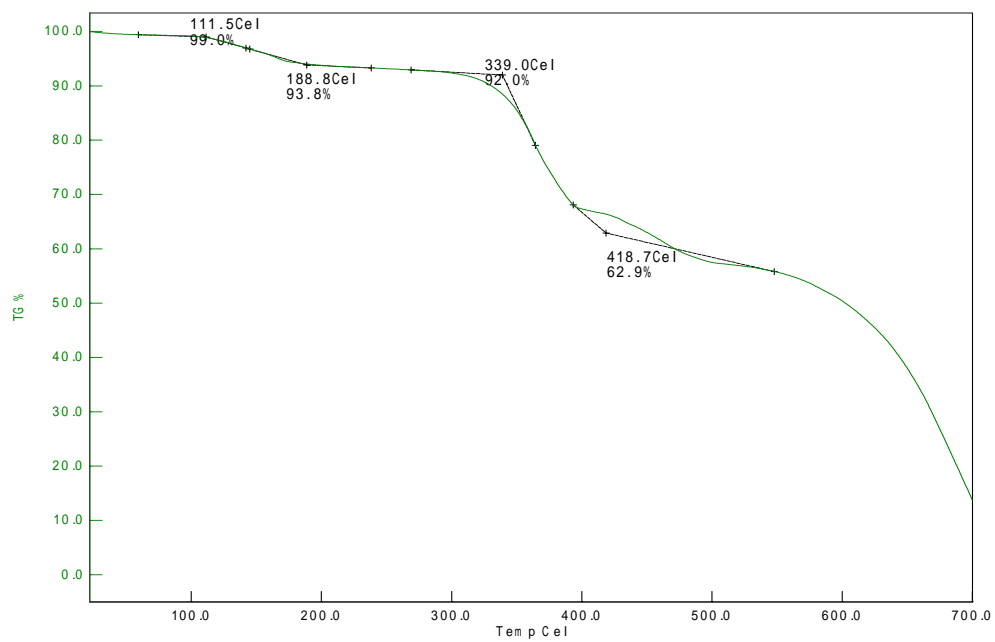

Figure S5. The TGA diagram for compound 1.

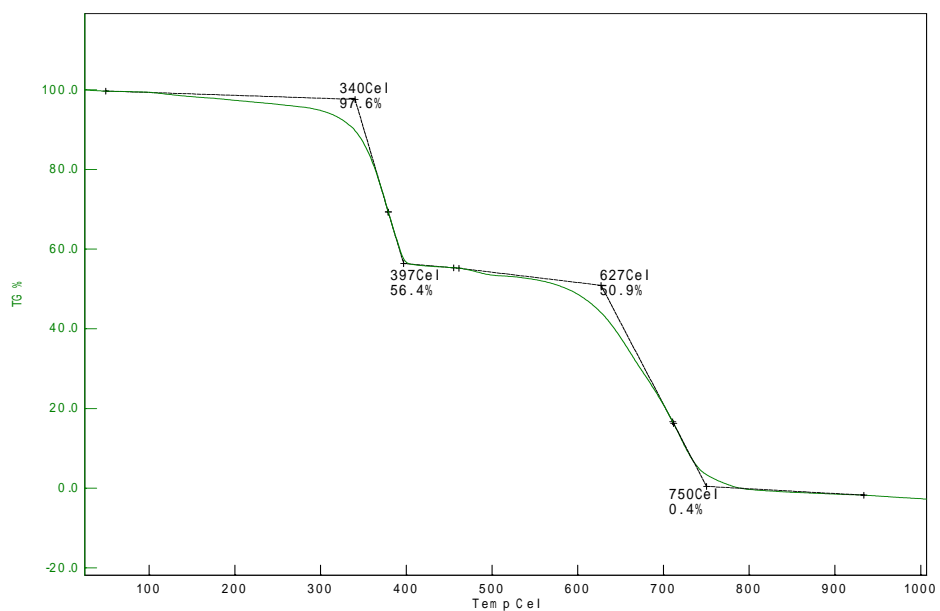

Figure S6. The TGA diagram for compound 2.

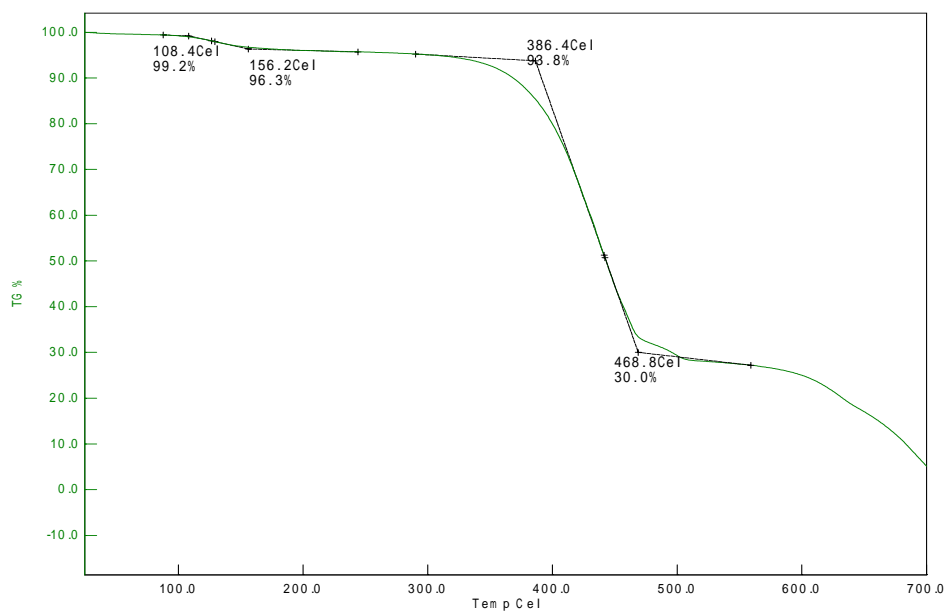

Figure S7. The TGA diagram for compound 3.

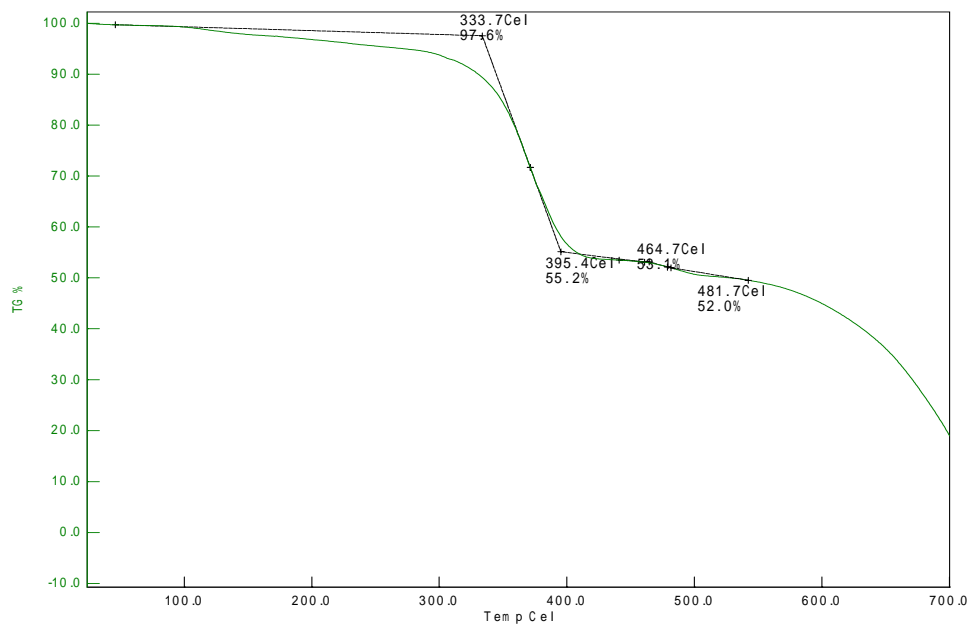

Figure S8. The TGA diagram for compound 4.
